# Supplementary material for: Enhancement of anti-leukemic potential of 2-hydroxyphenyl-azo-2′-naphthol (HPAN) on MOLT-4 cells through conjugation with Cu(ii)
Source: Royal Society of Chemistry journal article supplement (doi:10.1039/c3ra44765k), 2014-01-01
Supplement: c3ra44765k1.pdf [file c3ra44765k1.pdf]

**Fig. 1S**

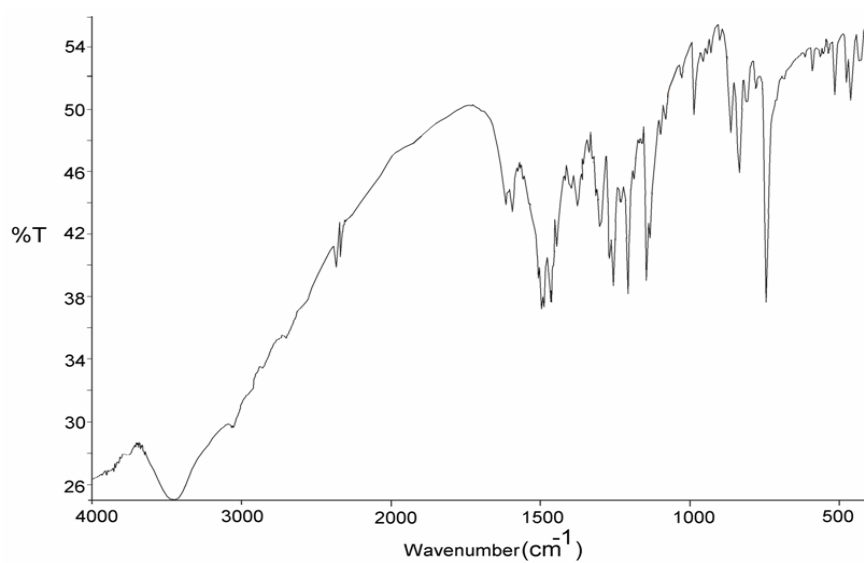

Fig. 1S: FTIR spectrum for Cu<sup>II</sup>(HPAN)<sub>2</sub>

**Fig. 2S**

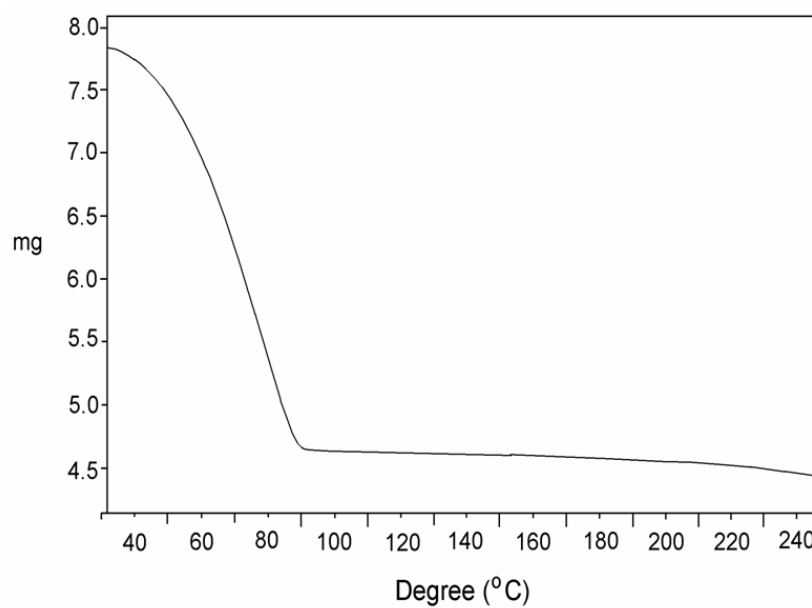

Fig. 2S: TGA curve of Cu<sup>II</sup>(HPAN)<sub>2</sub>

**Fig. 3S**

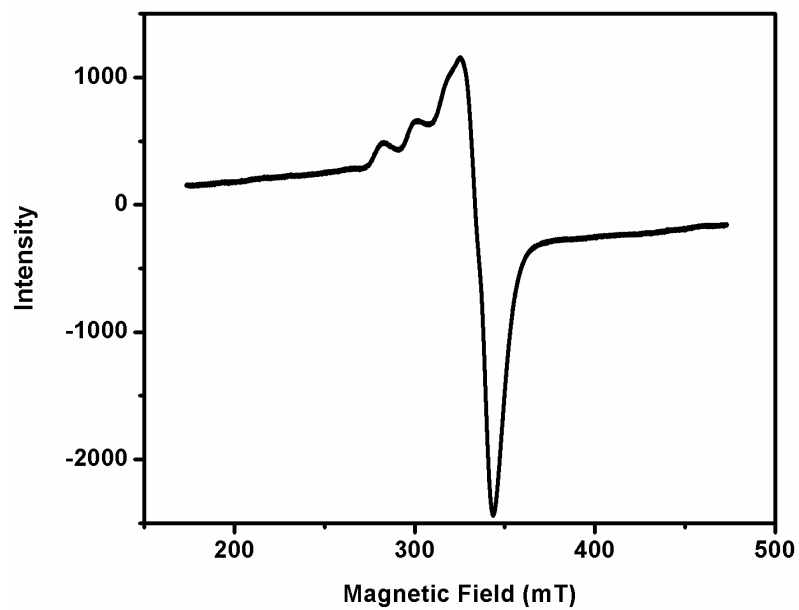

Fig. 3S: EPR spectrum of  $\text{Cu}^{\text{II}}(\text{HPAN})_2$  recorded at 298 K

**Fig. 4S**

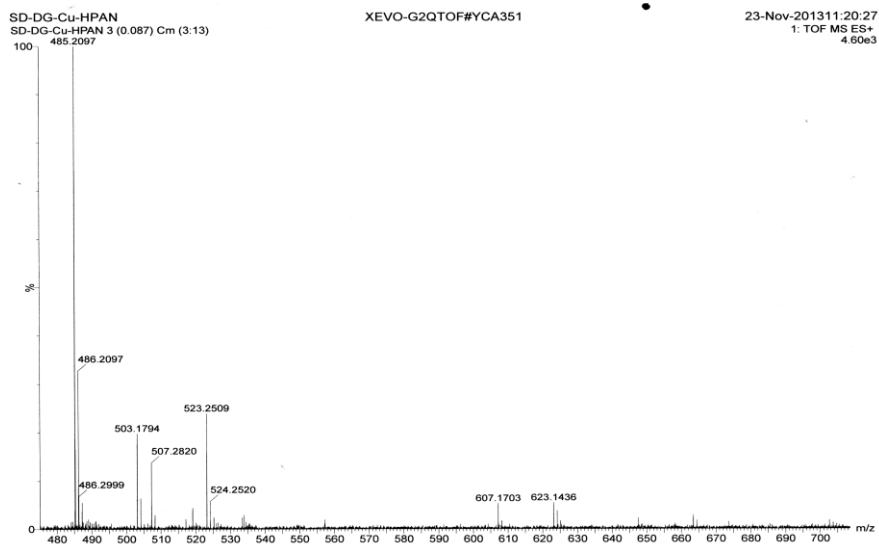

Fig. 4S: Mass spectrum of  $\text{Cu}^{\text{II}}(\text{HPAN})_2$

**Fig. 5S**

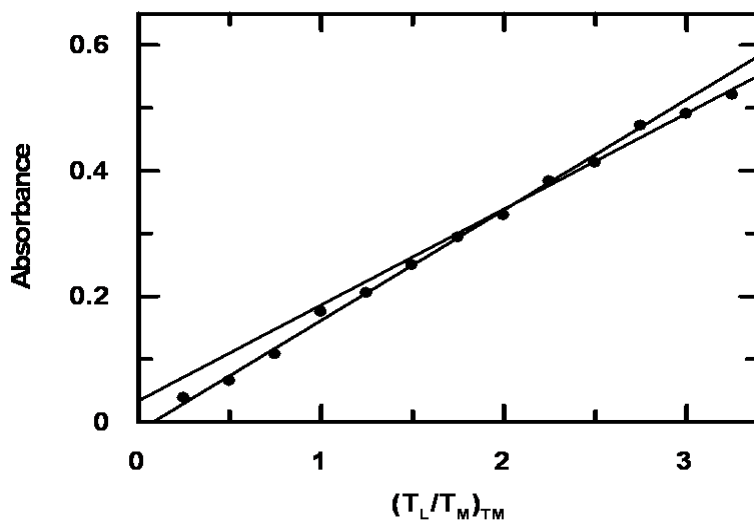

Fig. 5S: A typical plot for the determination of stoichiometry in solution by mole ratio method, following change in absorbance at 520 nm for  $\text{Cu}^{\text{II}}$  and HPAN;  $[\text{NaNO}_3] = 0.05 \text{ M}$ , Temp =  $25^\circ\text{C}$ .

**Fig. 6S**

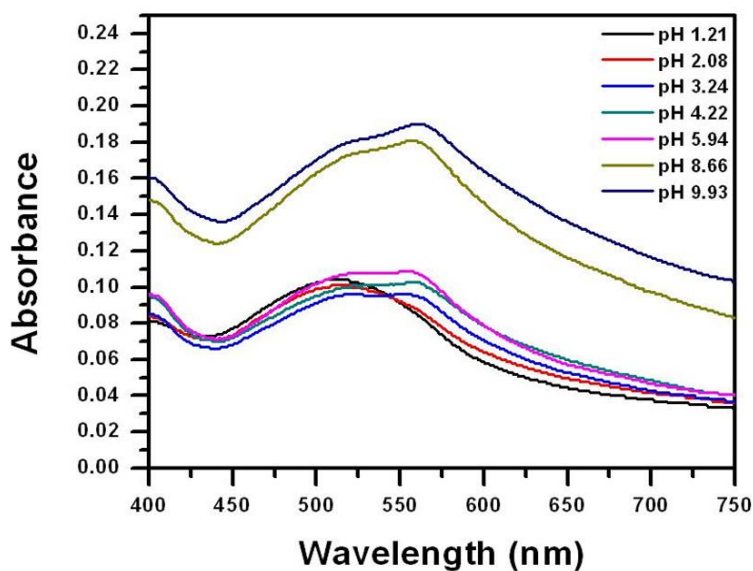

Fig. 6S: Absorption spectra for HPAN in the presence of  $\text{Cu}^{\text{II}}$  in aqueous solution at different pH (1) 3.81 (2) 5.65 (3) 7.71 (4) 9.50 (5) 11.66  $[\text{HPAN}] = 12\mu\text{M}$ ,  $[\text{Cu}^{\text{II}}] = 6\mu\text{M}$ ,  $[\text{NaNO}_3] = 0.05 \text{ M}$ , Temperature =  $298 \text{ K}$

**Fig. 7S**

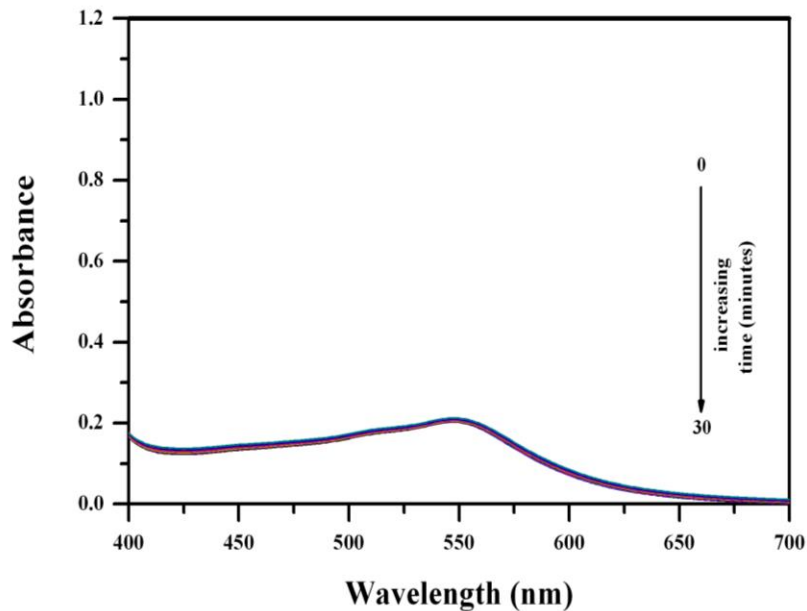

**Fig. 7S:** Plot of absorbance of  $[\text{Co}^{\text{II}}\text{-(HPAN)}_2]$  in the presence of NADPH and cytochrome c reductase in phosphate buffer medium (pH ~ 7.4) containing 0.12 M NaCl for time  $t = 0$  to  $t = 30$  minutes at 310 K in an enzymatic assay that monitors gradual reduction of the azo bond. The spectra indicate gradual loss of absorbance at 543 nm.  $[\text{NADPH}] = 0.00032\text{gm/ml}$ ; Cytochrome c reductase = 8 U/Lit.  $[\text{Co}^{\text{II}}\text{-(HPAN)}_2] = 100\text{ }\mu\text{M}$ .
