# Supplementary material for: Enhancement of anti-leukemic potential of 2-hydroxyphenyl-azo-2′-naphthol (HPAN) on MOLT-4 cells through conjugation with Cu(ii)
Source: Royal Society of Chemistry journal article supplement (doi:10.1039/c3ra44765k), 2014-01-01
Supplement: c3ra44765k1.pdf [file c3ra44765k1.pdf]

**Fig. 1S**

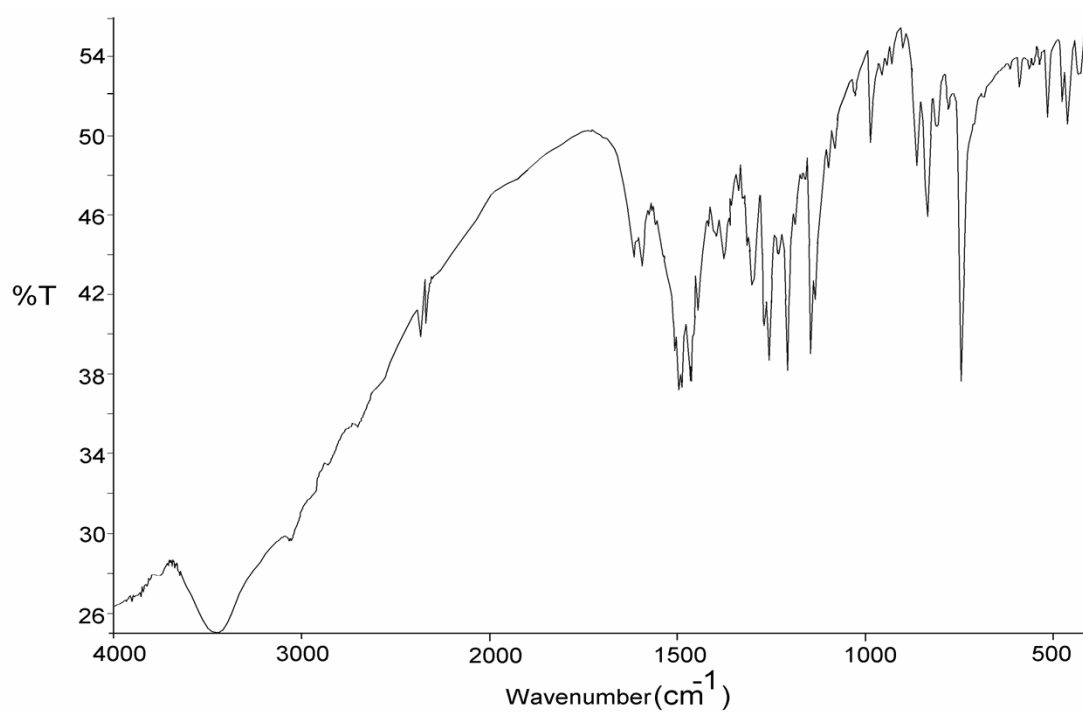

**Fig. 1S:** FTIR spectrum for Cu<sup>(II)</sup>(HPAN)<sub>2</sub>

**Fig. 2S**

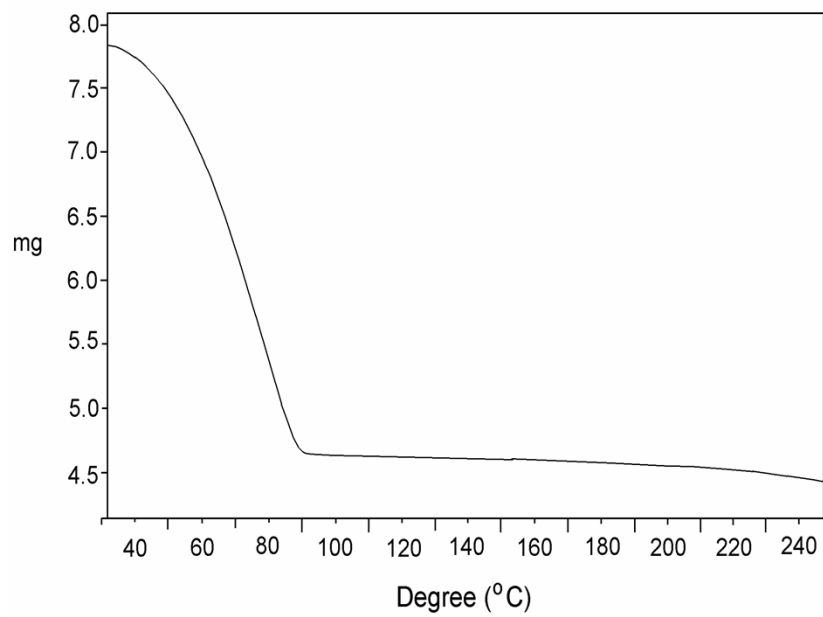

**Fig. 2S:** TGA curve of Cu<sup>(II)</sup>(HPAN)<sub>2</sub>

**Fig. 3S:**

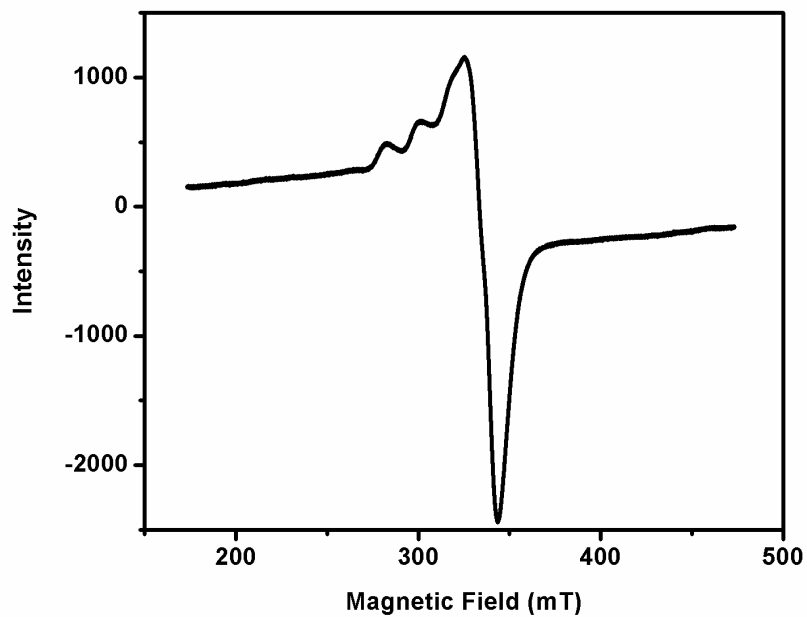

**Fig. 3S:** EPR spectrum of  $[\text{Cu}^{\text{II}}(\text{HPAN})_2]$  recorded at 298 K

**Fig. 4S**

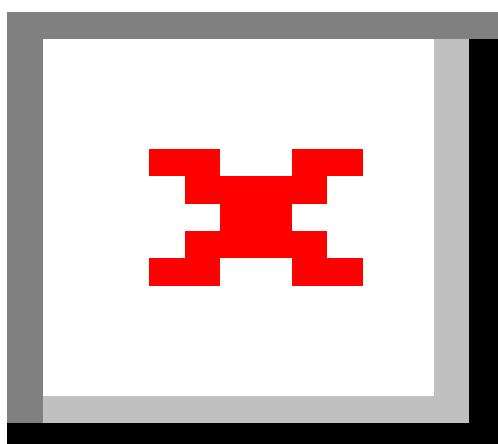

**Fig. 4S:** Mass spectrum of  $\text{Cu}^{\text{(II)}}(\text{HPAN})_2$

Fig. 5S

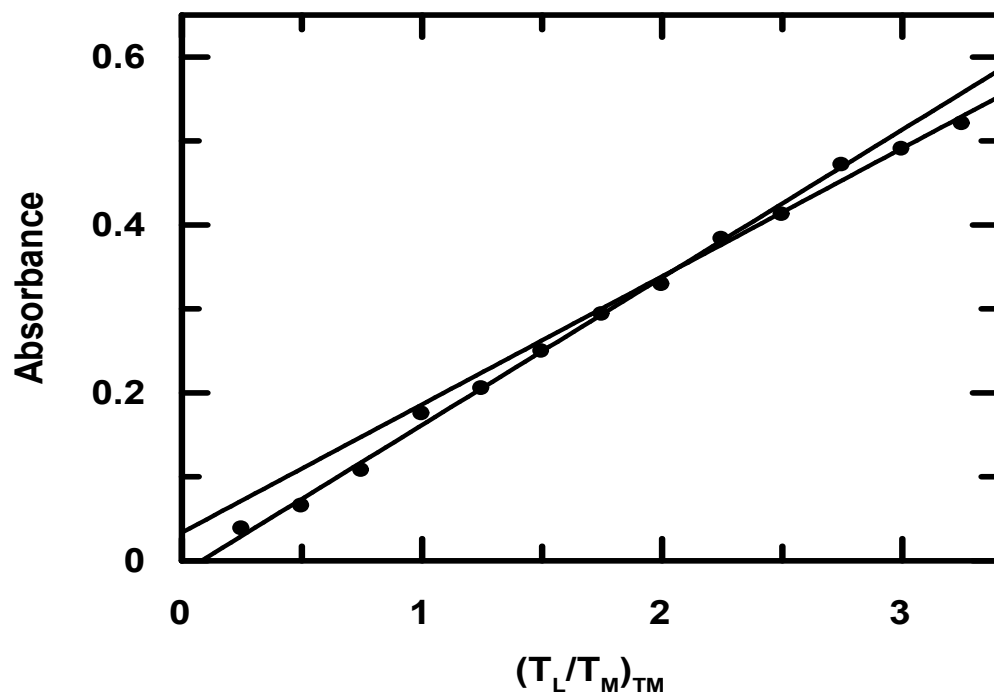

Fig. 5S: A typical plot for the determination of stoichiometry in solution by mole ratio method, following change in absorbance at 520 nm for Cu(II) and HPAN;  $[\text{NaNO}_3] = 0.05\text{M}$ , Temp = 25°C.

Fig. 6S:

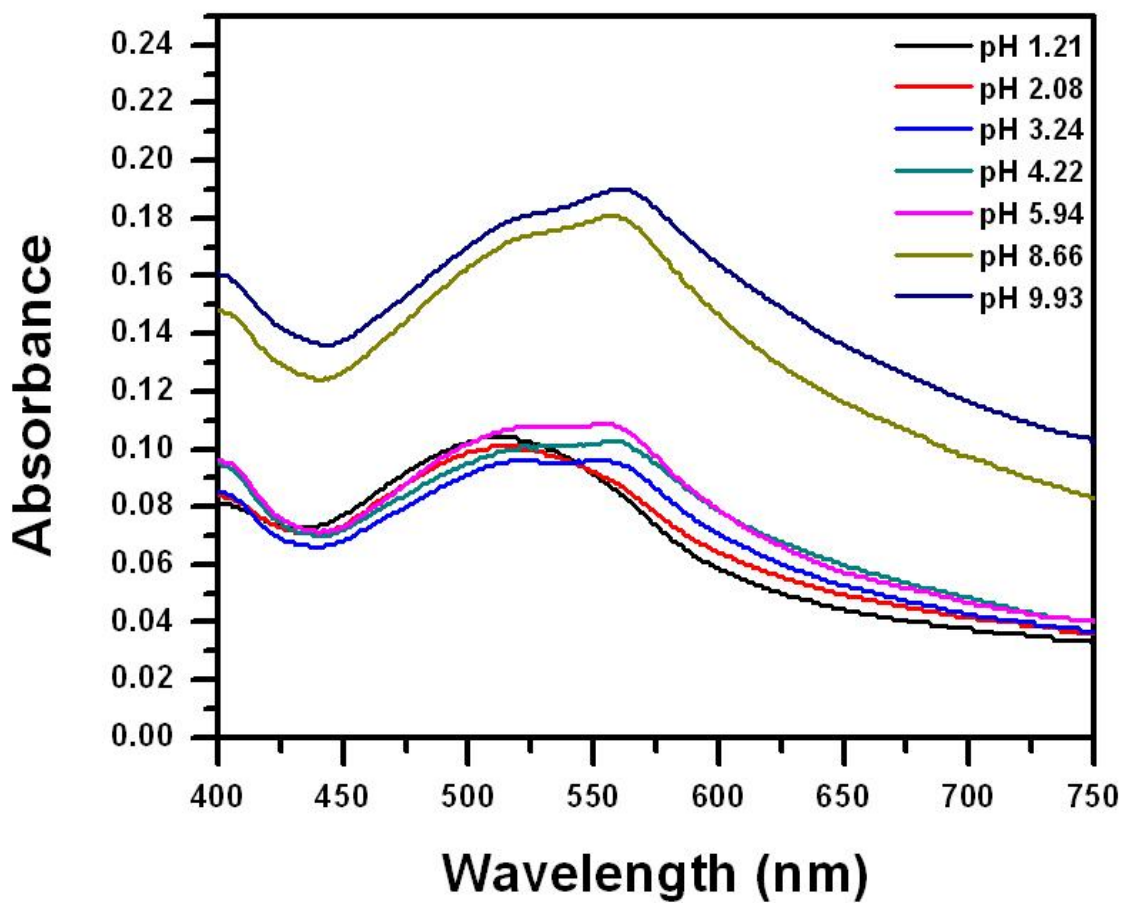

Fig. 6S: Absorption spectra for HPAN in the presence of Cu(II) in aqueous solution at different pH (1) 3.81,(2) 5.65, (3) 7.71, (4) 9.50,(5)11.66 [HPAN] = 12 $\mu$ M, [Cu<sup>+2</sup>] = 6 $\mu$ M, [NaNO<sub>3</sub>] = 0.05 M, Temperature = 298 K.

**Fig. 7S**

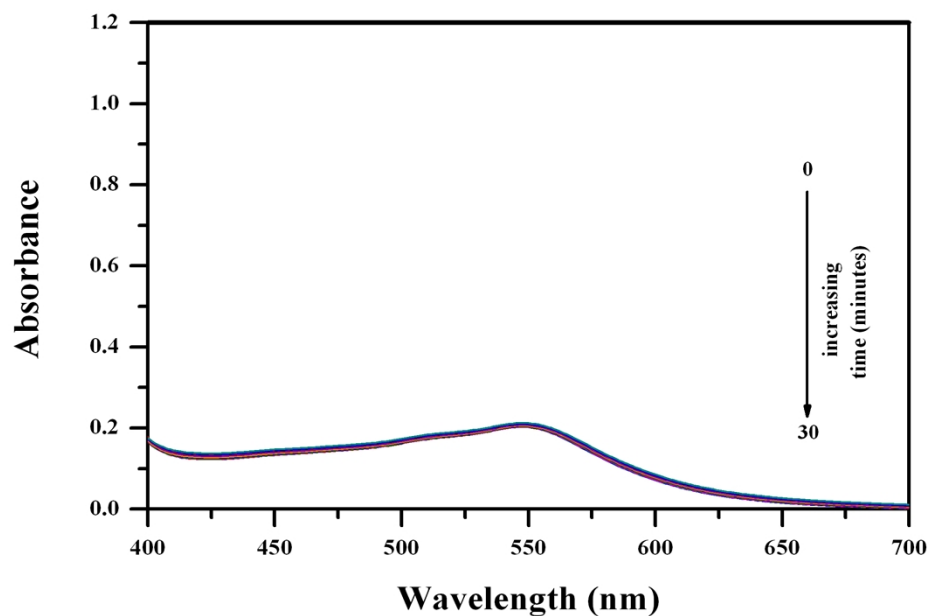

**Fig. 7S:** Plot of absorbance of [Co<sup>(II)</sup>-(HPAN)<sub>2</sub>] in the presence of NADPH and cytochrome c reductase in phosphate buffer medium (pH ~ 7.4) containing 0.12 M NaCl for time t = 0 to t = 30 minutes at 310 K in an enzymatic assay that monitors gradual reduction of the azo bond. The spectra indicate gradual loss of absorbance at 543 nm. [NADPH] = 0.00032gm/ml; Cytochrome c reductase = 8 U/Lit. [Co<sup>(II)</sup>-(HPAN)<sub>2</sub>] = 100 μM.
